# Supplementary material for: Dynamic Changes in PD-L1 Expression and Immune Infiltrates Early During Treatment Predict Response to PD-1 Blockade in Melanoma
Source: Oxford University Press journal article supplement (doi:10.1158/1078-0432.ccr-16-0698), 2017-05-16
Supplement: 10780432ccr160698-sup-163640_2_supp_3970374_kk4l9q.docx [file 10780432ccr160698-sup-163640_2_supp_3970374_kk4l9q.docx]

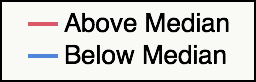

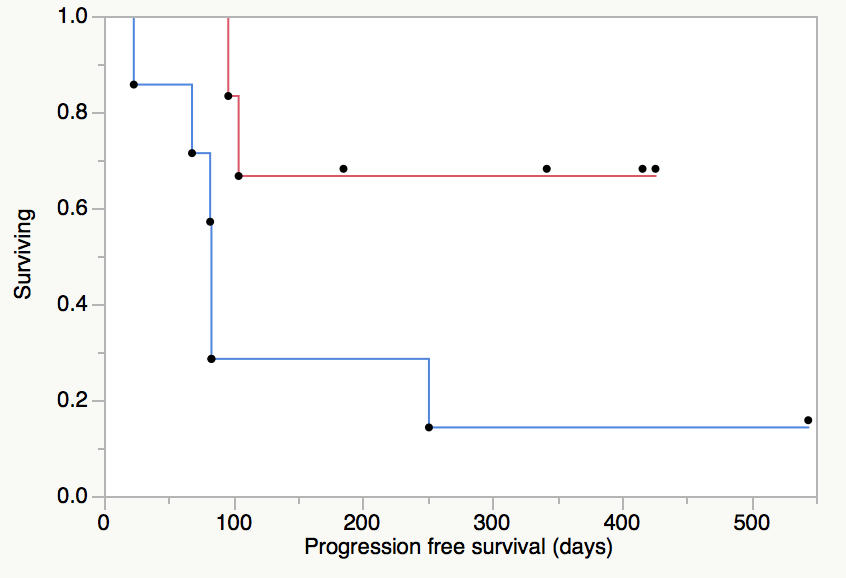


Log-rank test p=0.03

**Gain in intra-tumoral CD8 count and Progression free survival**

A


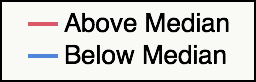

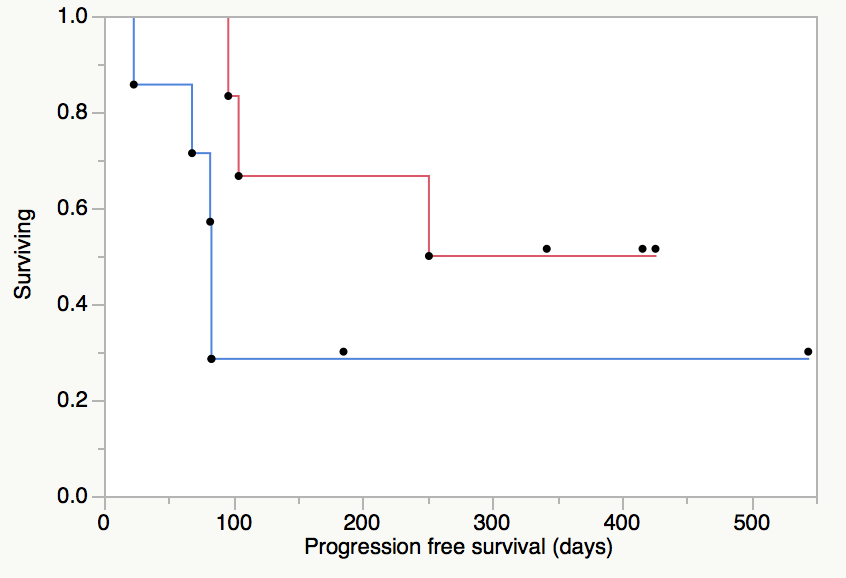


Log-rank test p=0.13

**Gain in intra-tumoral CD68 count and Progression free survival**

B

Supplementary Figure 3. Gain in immune cell counts and Kaplan-Meier progression free survival curves. **(A)** Progression free survival stratified according to median intra-tumoural CD8+ counts per 4 high power fields (median: 375 cells) **(B)** Progression free survival stratified according to median peri-tumoural CD68+ counts per mm2 (median: 212 cells).
